1 **High-risk *Escherichia coli* clones that cause neonatal meningitis and association with**  
2 **recrudescence infection**

3  
4 Nguyen Thi Khanh Nhu<sup>1,2,3</sup>, Minh-Duy Phan<sup>1,2,3</sup>, Steven J. Hancock<sup>2,3#</sup>, Kate M. Peters<sup>1,2,3</sup>,  
5 Laura Alvarez-Fraga<sup>2,3^</sup>, Brian M. Forde<sup>3,4</sup>, Stacey B. Andersen<sup>5</sup>, Thyl Miliya<sup>6</sup>, Patrick N.A.  
6 Harris<sup>4,7</sup>, Scott A. Beatson<sup>2,3</sup>, Sanmarie Schlebusch<sup>4,7,8</sup>, Haakon Bergh<sup>7</sup>, Paul Turner<sup>6,9</sup>,  
7 Annelie Brauner<sup>10</sup>, Benita Westerlund-Wikström<sup>11</sup>, Adam D. Irwin<sup>3,4,12\*</sup>, and Mark A.  
8 Schembri<sup>1,2,3\*</sup>

9  
10 <sup>1</sup>*Institute for Molecular Bioscience (IMB), The University of Queensland, Brisbane,*  
11 *Queensland, Australia*

12 <sup>2</sup>*School of Chemistry and Molecular Biosciences, The University of Queensland, Brisbane,*  
13 *Queensland, Australia*

14 <sup>3</sup>*Australian Infectious Diseases Research Centre, The University of Queensland, Brisbane,*  
15 *Queensland, Australia*

16 <sup>4</sup>*University of Queensland Centre for Clinical Research, The University of Queensland,*  
17 *Brisbane, Australia*

18 <sup>5</sup>*Genome Innovation Hub, The University of Queensland, Brisbane, Australia*

19 <sup>6</sup>*Cambodia Oxford Medical Research Unit, Angkor Hospital for Children, Siem Reap,*  
20 *Cambodia.*

21 <sup>7</sup>*Pathology Queensland, Health Support Queensland, Australia*

22 <sup>8</sup>*Q-PHIRE Genomics and Public Health Microbiology, Forensic and Scientific Services,*  
23 *Coopers Plains, Brisbane, Queensland, Australia*

24 <sup>9</sup>*Centre for Tropical Medicine and Global Health, Nuffield Department of Medicine,*  
25 *University of Oxford, Oxford, UK*

26 <sup>10</sup> *Department of Microbiology, Tumor and Cell Biology, Division of Clinical Microbiology,*  
27 *Karolinska Institutet and Karolinska University Hospital, Stockholm, Sweden*

28 <sup>11</sup> *Molecular and Integrative Biosciences Research Programme, University of Helsinki,*  
29 *Helsinki, Finland*

30 <sup>12</sup> *Infection Management Prevention Service, Queensland Children's Hospital, Brisbane,*  
31 *Queensland, Australia.*

32

33 #Current Address: Wellcome-Wolfson Institute for Experimental Medicine, School of  
34 Medicine, Dentistry and Biomedical Sciences, Queen's University Belfast, Belfast, United  
35 Kingdom.

36 ^Current address: INRAE, Univ Montpellier, LBE, 102 Avenue des Etangs, Narbonne 11100,  
37 France.

38

39 **Running title:** High risk neonatal meningitis *E. coli* clones

40 **Word count:** Text (3493 words), Abstract (249 words).

41

42 **\*Corresponding authors:**

43 Professor Mark Schembri, Institute for Molecular Bioscience, The University of Queensland,  
44 Brisbane, Queensland 4072, Australia. E-mail: [m.schembri@uq.edu.au](mailto:m.schembri@uq.edu.au).

45 Dr Adam Irwin, Centre for Clinical Research, University of Queensland, Brisbane,  
46 Queensland, Australia. Email: [a.irwin@uq.edu.au](mailto:a.irwin@uq.edu.au).

47



49 **Abstract**

50 Neonatal meningitis is a devastating disease associated with high mortality and neurological  
51 sequelae. *Escherichia coli* is the second most common cause of neonatal meningitis in full-  
52 term infants (herein NMEC) and the most common cause of meningitis in preterm neonates.  
53 Here we investigated the genomic relatedness of a collection of 58 NMEC isolates spanning  
54 1974-2020 and isolated from seven different geographic regions. We show NMEC are  
55 comprised of diverse sequence types (STs), with ST95 (34.5%) and ST1193 (15.5%) the  
56 most common. No single virulence factor was conserved in all isolates; however, genes  
57 encoding fimbrial adhesins, iron acquisition systems, the K1 capsule, and O antigen types  
58 O18, O75 and O2 were most prevalent. Antibiotic resistance genes occurred infrequently in  
59 our collection. We also monitored the infection dynamics in three patients that suffered  
60 recrudescence invasive infection caused by the original infecting isolate despite appropriate  
61 antibiotic treatment based on antibiogram profile and resistance genotype. These patients  
62 exhibited severe gut dysbiosis. In one patient, the causative NMEC isolate was also detected  
63 in the fecal flora at the time of the second infection episode and after treatment. Thus,  
64 although antibiotics are the standard of care for NMEC treatment, our data suggests that  
65 failure to eliminate the causative NMEC that resides intestinally can lead to the existence of a  
66 refractory reservoir that may seed recrudescence infection.

67

68 **Key words:** *E. coli*, neonatal meningitis, genomics, recrudescence infection, recurrent  
69 infection, gut dysbiosis

## 70 **Introduction**

71 Neonatal meningitis (NM) is a devastating disease with a mortality rate of 10-15% and severe  
72 neurological sequelae including hearing loss, reduced motor skills and impaired development  
73 in 30-50% of cases [1-3]. The incidence of disease is highest in low-income countries and  
74 occurs at a rate of 0.1-6.1/1000 live births [3]. *Escherichia coli* is the second most common  
75 cause of NM in full-term infants (herein NMEC), after group B *Streptococcus* (GBS) [4, 5],  
76 and the most common cause of meningitis in preterm neonates [5, 6]. Together, these two  
77 pathogens cause ~60% of all cases, with on average one case of NMEC for every two cases  
78 of GBS [7, 8]. In several countries, NM incidence caused by GBS has declined due to  
79 maternal intrapartum antibiotic prophylaxis; however, NM incidence caused by *E. coli*  
80 remains the same [7, 9]. Moreover, NMEC is a significant cause of relapsed infections in  
81 neonates [10].

82

83 NMEC are categorised genetically based on multi-locus sequence type (ST) or by serotyping  
84 based on cell-surface O antigen (O), capsule (K) and flagella (H) antigens. Analysis of  
85 NMEC diversity in France revealed ~25% of isolates belong to the ST95 clonal complex  
86 (STc95) [11], however, a global picture of NMEC epidemiology is lacking. NMEC possess a  
87 limited diversity of serotypes, dominated by O18:K1:H7, O1:K1, O7:K1, O16:K1, O83:K1  
88 and O45:K1:H7, which together account for >70% of NMEC [12-15]. Notably, ~80% of  
89 NMEC express the K1 capsule, a polysaccharide comprising linear homopolymers of  $\alpha$ 2-8-  
90 linked N-acetyl neuraminic acid [12, 16]. Apart from the K1 capsule, specific NMEC  
91 virulence factors are less-well defined, though studies have demonstrated a role for S  
92 fimbriae [17], the outer membrane protein OmpA [18], the endothelial invasin IbeA [19] and  
93 the cytotoxin necrotising factor CNF1 [20] in translocation of NMEC across the blood-brain  
94 barrier and pathogenesis. A large plasmid encoding colicin V (ColV), colicin Ia bacteriocins

95 and several virulence genes including iron-chelating siderophore systems has also been  
96 strongly associated with NMEC virulence [21].

97

98 Despite being the second major NM aetiology, genomic studies on NMEC are lacking, with  
99 most reporting single NMEC complete genomes. Here we present the genomic analyses of a  
100 collection of 58 NMEC isolates obtained from seven different geographic regions over 46  
101 years to understand virulence gene content, antibiotic resistance and genomic diversity. In  
102 addition, we provide a complete genome for 18 NMEC isolates representing different STs,  
103 serotypes and virulence gene profiles, thus more than tripling the number of available NMEC  
104 genomes that can be used as references in future studies. Three infants in our study suffered  
105 recrudescence of invasive NMEC infection, and we show this was caused by the same isolate. We  
106 further revealed that patients that suffered recrudescence of invasive infection had severe gut  
107 dysbiosis, and detected the infecting isolate in the intestinal microflora, suggesting NMEC  
108 colonisation of the gut provides a reservoir that can seed repeat infection.

109

110

## 111 **Results**

### 112 **Establishment of an NMEC collection from geographically diverse locations**

113 A collection of 52 NMEC isolates cultured from the blood or cerebrospinal fluid (CSF) of  
114 neonates with meningitis was established with the addition of six completely sequenced  
115 NMEC genomes available on the NCBI database. This yielded a final set of 58 NMEC  
116 isolates spanning 1974 to 2020 (Supplementary Table 1). The isolates were obtained from  
117 seven different geographic locations; Finland (n=17, 29.3%), Sweden (n=14, 24.1%),  
118 Australia (n=15, 25.9%), Cambodia (n=7, 12.1%), USA (n=3, 5.2%), France (n=1, 1.7%) and  
119 the Netherlands (n=1, 1.7%).

120

121 **ST95 and ST1193 are the two major STs of NMEC**

122 Phylogenetic analysis was performed on the 58 NMEC isolates, with an additional eight well-  
123 characterised *E. coli* strains included for referencing (EC958, UTI89, MS7163, CFT073,  
124 UMN026, 536, APEC01, MG1655) (Supplementary Table 1). The NMEC isolates were  
125 diverse, and spanned phylogroups A, B2, C, D and F; the majority of isolates were from  
126 phylogroup B2 (n=48, 82.8%). Overall, the isolates belonged to 22 STs, of which 15 STs  
127 only contained one isolate. ST95 (n=20, 34.5%) and ST1193 (n=9, 15.5%) were the two most  
128 common NMEC STs (Figure 1, Supplementary Table 1). ST95 isolates were obtained over  
129 the entire study period, while ST1193 isolates were more recent and only obtained from  
130 2013. Four isolates belonged to ST390 (6.9%), which is part of the STc95. One isolate  
131 belonged to a novel ST designated ST11637, which is part of the ST14 clonal complex  
132 (STc14) that also contains ST1193 (Figure 1, Supplementary Table 1). Isolates from other  
133 common phylogroup B2 extra-intestinal pathogenic *E. coli* (ExPEC) lineages, ST131, ST73  
134 and ST69, as well as several STs associated with environmental sources such as ST48 and  
135 ST23, were detected in the collection. However, it is notable that the high incidence of NM  
136 associated with ST95 and ST1193 does not reflect the broader high prevalence of major  
137 ExPEC clones associated with human infections in the publicly available Enterobase database  
138 [22] (Supplementary Figure 1), suggesting ST95 and ST1193 exhibit specific virulence  
139 features associated with their capacity to cause NM.

140

141 Eighteen NMEC isolates were completely sequenced using complementary long-read Oxford  
142 Nanopore Technology, enabling accurate comparison of NMEC genome size, genomic island  
143 composition and location, and plasmid and prophage diversity (Supplementary Table 2).  
144 These isolates spanned the diversity in the collection, representing 11 different STs, including

145 two ST1193 isolates (one with the dominant O75:H5 serotype and one with an unusual  
146 O6:H5 serotype), five ST95 isolates with different serotypes, and one isolate from the novel  
147 ST11637.

148

#### 149 **Antibiotic resistance in NMEC**

150 Antibiotic resistance profiling revealed an overall low level of resistance in the collection.  
151 The ST1193 isolates contained fluoroquinolone resistance defining mutations in *gyrA* (S83L  
152 D87N) and *parC* (S80I), as previously described for this lineage [23]. In addition, 77.8% of  
153 ST1193 isolates (7/9 isolates) also harboured at least one gene conferring resistance to  
154 aminoglycosides (*aac(3)-IId*, *aadA5*, *aph(3'')-Ib* and *aph(6)-Id*), trimethoprim (*dftA17*) and  
155 sulphonamides (*sul1* and *sul2*) (Supplementary Figure 2). Six out of the seven isolates from  
156 Cambodia had more than one antibiotic resistance gene, likely reflecting increased antibiotic  
157 resistance rates in this region [24]. Indeed, in addition to *gyrA* and *parC* mutations for  
158 fluoroquinolone resistance, CAM-NMEC-6 contains 14 antibiotic resistance genes (including  
159 resistance to third-generation cephalosporins and carbapenems) and CAM-NMEC-4 contains  
160 11 antibiotic resistance genes (Supplementary Figure 2).

161

#### 162 **Virulence factors in NMEC**

163 The isolates exhibited variable distribution of virulence genes previously linked to NMEC  
164 pathogenesis. The most prevalent genes were those involved in iron uptake, including the  
165 enterobactin (98%), yersiniabactin (98%), aerobactin (62%) and salmochelin (55%)  
166 siderophore systems, and the heme receptors *chuA* (93%) and *hma* (62%) (Figure 1). Also  
167 common were the *sitABCD* genes encoding an iron/manganese transporter (98%). The  
168 presence of fimbrial and afimbrial adhesins was also diverse. The most prevalent adhesins  
169 were type 1 fimbriae (100%), *mat (ecp)* fimbriae (98%) and the *fdeC* adhesin (98%). Genes



170 encoding P and S fimbriae were detected in 36% and 22% of NMEC isolates, respectively.  
171 The most prevalent toxin was the uropathogenic-specific genotoxin *usp* (83%), which was  
172 only found in phylogroup B2 isolates. Other toxin genes encoding the serine protease  
173 autotransporters Vat (65% prevalence) and Sat (29%), hemolysin (12%) and cytotoxic  
174 necrotizing factor-1 (7%) were less prevalent. Additional virulence genes included the *asIA*  
175 arylsulfatase (95%), the *iss* lipoprotein (76%) and the *ibeA* invasin (33%). The ColV-plasmid  
176 was present in 33% of the isolates (Figure 1, Supplementary Table 1). Direct comparison of  
177 virulence factors between ST95 and ST1193, the two most dominant NMEC STs, revealed  
178 that the ST95 isolates (n = 20) contained significantly more virulence factors than the  
179 ST1193 isolates (n = 9); *P*-value < 0.001, Mann-Whitney two-tailed unpaired test  
180 (Supplementary Table 1, Supplementary Figure 3).

181

### 182 **NMEC comprise a dominant K1 capsule type and a limited pool of O and H serotypes**

183 The capsule type of the NMEC isolates was determined by *in silico* typing. K1 was the  
184 dominant capsule type in the collection (43/58 isolates, 74.1%) (Figure 1). Thirty-four of  
185 these isolates were available for capsule testing, and we confirmed K1 expression by ELISA  
186 in all but two isolates (Supplementary Figure 4). Other capsule types included K2, K5 and  
187 K14 (Supplementary Table 1). A capsule type could not be resolved for 12 isolates, of which  
188 eight did not possess a Group II or Group III capsule type based on the absence of the  
189 conserved *kpsD* gene (Figure 1, Supplementary Table 1).

190

191 *In silico* O-antigen (O) and flagella (H) serotypes were also determined. O18 was the most  
192 common O type (n=16, 27.6%), followed by O75 (n=8, 13.9%) and O2 (n=7, 12.1%). The  
193 most dominant H types were H7 (n=19, 32.8%), H5 (n=13, 22.4%) and H4 (n=9, 15.5%).  
194 The most common serotype was O18:H7:K1 (n=14, 24.1%); these isolates belonged to the

195 STc95 (nine ST95, four ST390 and one ST416). The second most common serotype was  
196 O75:H5:K1 (n=8, 13.8%); six isolates from ST1193 possessed this serotype.

197

198 **NMEC can cause recrudescence invasive infection despite appropriate antibiotic**  
199 **treatment**

200 During 2019 - 2020, three patients from which NMEC isolates were originally cultured  
201 suffered recrudescence invasive infection (Figure 1; MS21522, MS21524 and MS22733),  
202 providing an opportunity to compare the infecting isolates over time using whole genome  
203 sequencing. In all cases, the infecting *E. coli* isolates were susceptible to the therapy, which  
204 comprised cefotaxime (50mg/kg/dose 8 hourly), switched to ceftriaxone (100mg/kg/day) to  
205 facilitate home parenteral antibiotic administration. Bacterial culture was performed from  
206 blood, CSF, urine and/or stool during the infection period (Figure 2). These patients were  
207 from different regions in Australia.

208

209 ***Patient 1***

210 Patient 1 (0-8 weeks of age) was admitted to the emergency department with fever,  
211 respiratory distress and sepsis. The child was diagnosed with meningitis based on a  
212 cerebrospinal fluid (CSF) pleocytosis (>2000 white blood cells; WBCs, low glucose, elevated  
213 protein), positive CSF *E. coli* PCR and a positive blood culture for *E. coli* (MS21522). Two  
214 weeks after completion of a 3-week course of appropriately dosed therapy with third-  
215 generation cephalosporins as described above, the child developed similar symptoms of fever  
216 and irritability. Lumbar puncture was performed and the CSF culture was positive for *E. coli*  
217 (MS21576). Both the initial blood culture isolate and the relapse CSF isolate were non-  
218 susceptible to ciprofloxacin and gentamycin, and whole genome sequencing revealed they  
219 were identical (ST1193 O18:K1:H5; *fimH64*), with no single nucleotide polymorphisms

220 (SNPs) nor indels (Figure 2A). Unlike the typical ST1193 O75 serotype [23], this isolate  
221 contained a unique O18 serotype. The isolate possessed mutations in *gyrA* (S83L D87N) and  
222 *parC* (S80I), which explain its resistance to ciprofloxacin, as well as a multidrug resistance  
223 IncF plasmid containing genes conferring resistance to aminoglycosides (*aac(3)-IId*, *aadA5*,  
224 *aph(3'')-Ib* and *aph(6)-Id*), trimethoprim (*dfrA17*), sulphonamides (*sul1* and *sul2*) and  
225 macrolides (*mphA*) (Supplementary Figure 2). Treatment of the relapse was extended to six  
226 weeks of intravenous therapy. At follow-up, no anatomical or immunological abnormality  
227 was identified and development is normal.

228

## 229 **Patient 2**

230 Patient 2 (0-8 weeks of age) presented to the emergency department with a febrile illness.  
231 Blood and urine cultures on admission were positive for *E. coli*. CSF taken 24 hours after  
232 treatment revealed pleocytosis (>300 WBCs, >95% polymorphs) but no bacteria were  
233 cultured. The patient completed a 3-week course of appropriately dosed antibiotic therapy  
234 with third-generation cephalosporins. In the 6-week period after discharge, the child had  
235 several short admissions to hospital, but no infection was identified. At 11 weeks post initial  
236 infection, the child was re-admitted to hospital with high fever. CSF cultures were negative  
237 and microscopy was normal, but cultures from blood, urine and faeces were all positive for *E.*  
238 *coli*. Whole genome sequencing revealed that all isolates belonged to ST537 O75:H5 (*fimH5*;  
239 STc14). Pairwise comparison of the recrudescence isolates showed that the urine and fecal  
240 isolates were identical to the original isolate, while the blood isolate contained one  
241 nonsynonymous SNP in the *mdoH* gene encoding a glucan biosynthesis glucosyltransferase  
242 (T1358G; V453G). This mutation is located in the large cytoplasmic domain of MdoH likely  
243 involved in polymerisation of glucose from UDP glucose; the isolate exhibited a mucoid  
244 colony morphology suggestive of increased colanic acid production. The isolates did not

245 possess plasmids nor antibiotic resistance genes. The infant experienced recurrent urinary  
246 tract infections with *E. coli* and other urinary pathogens through infancy despite normal  
247 urinary tract anatomy. At follow-up, no other history of invasive infection nor identified  
248 immunodeficiency were noted, and the child was reported to be developing normally.

249

### 250 ***Patient 3***

251 Patient 3 (0-8 weeks of age) was admitted to the paediatric intensive care unit with fever and  
252 seizures. CSF and blood cultured a fully susceptible *E. coli*. Two weeks after completing a  
253 four-week course of appropriate therapy with third-generation cephalosporins, the infant was  
254 readmitted to hospital with fever and irritability, with further investigation identifying *E. coli*  
255 in CSF, urine and blood. Three weeks after the completion of the six-week treatment course,  
256 the infant experienced a second relapse, with *E. coli* isolated from both CSF and blood.  
257 Whole genome sequencing revealed that all isolates were identical and belonged to ST131  
258 O25b:K1:H4 (*fimH22*). These isolates contained a ColV-virulence plasmid, but did not  
259 harbour acquired antibiotic resistance genes. The infant received a further 6-week course of  
260 therapy. Extensive imaging studies including repeated MRI imaging of the head and spine,  
261 CT imaging of the head and chest, ultrasound imaging of abdomen and pelvis, and nuclear  
262 medicine imaging did not show a congenital malformation or abscess. Immunological work-  
263 up did not show a known primary immunodeficiency. At follow-up, speech delay is reported  
264 but no other developmental abnormality.

265

### 266 **The gut as a reservoir to seed recrudescence infection**

267 In all three patients that suffered NM and recrudescence invasive infection, the causative  
268 isolates were susceptible to third-generation cephalosporins, suggesting the existence of a  
269 persistent reservoir that could evade the cidal effect of antibiotic treatment and seed repeat

270 infection. Indeed, the fact that the causative *E. coli* isolate was detected from a fecal sample  
271 at the time of the recrudescence infection in patient 2 (day 77 after initial admission), suggests  
272 that NMEC could persist in the gut and cause repeat infection, an observation that has also  
273 been reported for uropathogenic *E. coli* that cause recurrent urinary tract infection [25] and  
274 acute pyelonephritis in infants [26]. Therefore, we retrospectively examined available stored  
275 fecal samples from patient 2 at 8- and 12-week follow-up visits post recrudescence infection  
276 (days 149 and 174 after initial admission) and patient 3 during treatment and at discharge  
277 after the third episode (days 126 and 147 after initial admission) using short-read  
278 metagenomic sequencing (Figure 3). Although no fecal samples were available for  
279 comparative analysis from either patient prior to antibiotic treatment, we observed a low level  
280 of diversity in the composition of the microbiome of both patients, consistent with severe  
281 dysbiosis. The microbiome of patient 2 was dominated by *Enterobacter* (37.4% relative  
282 abundance), *Achromobacter* (23.4% relative abundance) and *Bacteroides* (22.7% relative  
283 abundance) genera at 8-weeks post recrudescence infection (day 149 after initial admission),  
284 and by *Bacteroides* genera (75.8% relative abundance) at 12-weeks post recrudescence  
285 infection (day 174 after initial admission). The relative abundance of *E. coli* was 2.05% and  
286 4.1% in each of these samples, respectively, and further analysis using StrainGE [27] showed  
287 that the isolates were most closely matched to the original causative MS21524 isolate. We  
288 further employed complementary long-read metagenomic sequencing to analyse the 8-week  
289 post relapse infection sample, which enabled construction of a complete *E. coli* genome that  
290 was identical to the causative ST537 (*fimH5*) isolate (Figure 2, Figure 3; Supplementary  
291 Table 3). In the 12-week post recrudescence infection fecal sample from patient 2, amplicon  
292 sequencing targeting *fimH* identified the presence of *E. coli* with the same *fimH* type as the  
293 causative isolate (*fimH5*). Thus, two independent analyses of samples taken 4 weeks apart  
294 demonstrated the existence of the *E. coli* ST537 isolate in the intestinal microflora of patient

295 2. In patient 3, the microbiome was dominated by *Enterococcus* genera at both time points  
296 examined (93% and 97.4% relative abundance). We were unable to detect *E. coli* by *fimH*  
297 amplicon sequencing and the relative abundance of *E. coli* in these fecal samples was  
298 extremely low (<0.01%) based on metagenomic sequencing (Supplementary Table 3). The  
299 extensive dysbiosis revealed in this patient is likely an outcome of the three rounds of  
300 antibiotic treatment.

301

## 302 **Discussion**

303 In this study, we present a genomic analysis of 58 NMEC isolates obtained over 46 years  
304 spanning seven different geographic locations and reveal a dominance of ST95 and ST1193.  
305 We also provide direct evidence to implicate the gut as a reservoir for recrudescence of invasive  
306 infection in some patients despite appropriate antibiotic treatment.

307

308 The majority of the NMEC isolates in our study belonged to phylogroup B2 (82.8%), an  
309 observation consistent with other reports [28, 29]. These isolates were predominantly from  
310 two major STs, ST95 and ST1193. ST95 represents a major clonal lineage responsible for  
311 urinary tract and bloodstream infections [30, 31], and were identified throughout the period  
312 of investigation. This lineage was also previously shown to cause ~25% of NM cases in  
313 France in the period 2004-2015 [11], demonstrating its enhanced capacity to cause  
314 disseminated infection in newborns. ST1193, on the other hand, was first identified in 2012  
315 [32], and is the second most common fluoroquinolone-resistant *E. coli* lineage after ST131  
316 [23, 33]. ST1193 causing NM was first reported in the USA in 2016 [34]. Here, ST1193  
317 accounted for 15.5% of NMEC isolates, all of which were obtained from 2013, and was the  
318 dominant lineage since this time. This is consistent with a report in China that showed  
319 ST1193 was the most common NMEC (21.4%), followed by ST95 (17.9%), between 2009-  
320 2015 [35]. Concerningly, the ST1193 isolates examined here carry genes encoding several  
321 aminoglycoside-modifying enzymes, generating a resistance profile that may lead to the  
322 clinical failure of empiric regimens such as ampicillin and gentamicin, a therapeutic  
323 combination used in many settings to treat NM and early-onset sepsis [36, 37]. This, in  
324 combination with reports of co-resistance to third-generation cephalosporins for some  
325 ST1193 isolates [23, 35], would limit the choice of antibiotic treatments. The dominance of  
326 both ST95 and ST1193 in our collection is notable since other widespread *E. coli* phylogroup

327 B2 lineages such as ST131, ST73, ST69 and ST12 do not cause similar rates of NM disease.  
328 We speculate this is due to the prevailing K1 polysialic acid capsule serotype found in ST95  
329 and the newly emerged ST1193 clone [23, 38] in combination with other virulence factors  
330 [15, 28, 29] (Figure 4) and the immature immune system of preterm infants. Understanding  
331 the risk of these clones, as well as perinatal transmission and antibiotic resistance patterns,  
332 may inform the appropriateness of interventions such as maternal screening or antimicrobial  
333 prophylaxis.

334

335 Although reported rarely, recrudescence of invasive *E. coli* infection in NM patients, including  
336 several infants born pre-term, has been documented in single study reports [39, 40]. In these  
337 reports, infants received appropriate antibiotic treatment based on antibiogram profiling and  
338 no clear clinical risk factors to explain recrudescence were identified, highlighting our limited  
339 understanding of NM aetiology. Here, we tracked NMEC recurrence using whole genome  
340 sequencing in three patients that suffered NM and recrudescence of invasive infection, and  
341 demonstrated that the isolate causing recrudescence was the same as the original causative  
342 isolate and susceptible to the initial antibiotic therapy. In one patient (patient 2), we identified  
343 the causative isolate in the stool at days 77, 149 and 174 after initial detection in the  
344 bloodstream, providing direct evidence of persistence in the gut, and implicating this site as a  
345 reservoir to seed repeat infection. This isolate belonged to ST537 (serotype O75:H5) and is  
346 from the same clonal complex as ST1193 (i.e. STc14).

347

348 This study had several limitations. First, our NMEC collection was restricted to seven  
349 geographic regions, a reflection of the difficulty in acquiring isolates causing this disease.  
350 Second, we did not have access to a complete set of stool samples spanning pre- and post-  
351 treatment in the patients that suffered NM and recrudescence of invasive infection. This impacted



352 our capacity to monitor *E. coli* persistence and evaluate the effect of antibiotic treatment on  
353 changes in the microbiome over time. Third, we did not have access to urine or stool samples  
354 from the mother of the infants that suffered recrudescence, and thus cannot rule out mother-  
355 to-child transmission as a mechanism of reinfection. Finally, we did not have clinical data on  
356 the weeks of gestation for all patients, and thus could not compare virulence factors from  
357 NMEC isolated from preterm versus term infants. Regardless, our study describes the  
358 genomic diversity of NMEC, highlighting ST95 and ST1193 as the most important clonal  
359 lineages associated with this devastating disease. Although antibiotics are the standard of care  
360 for NMEC treatment, we show that even when appropriate antibiotics are used, in some cases  
361 they do not eliminate the causative NMEC that resides intestinally. Together with associated  
362 antibiotic-driven dysbiosis, this reveals a need to consider diagnostic and therapeutic  
363 interventions to mitigate the risk of recrudescence infection.

364

365

## 366 **Methods**

### 367 **Ethics statement**

368 The study received ethical approval from the Children's Health Queensland Human Research  
369 Ethics Committee (LNR/18/QCHQ/45045). Precise patient details have been removed for  
370 ethics compliance; additional de-identified details are available from the corresponding  
371 author upon request.

372

### 373 **Bacterial isolates**

374 A collection of 52 NMEC isolates obtained from 1974 to 2020 was achieved from Sweden,  
375 Finland, Cambodia and Australia. Isolates were stored in glycerol at -80°C until use. All  
376 isolates were cultured in Lysogeny broth. The collection comprised 42 isolates from

377 confirmed meningitis cases (29 cultured from CSF and 13 cultured from blood) and 10  
378 isolates from clinically diagnosed meningitis cases (all cultured from blood) (Table S1). This  
379 collection was complemented by the addition of six completely sequenced NMEC genomes  
380 available on the NCBI database, namely strains IHE3034, RS218, S88, NMEC58, MCJCHV-  
381 1 and CE10.

382

### 383 **DNA extraction, genome sequencing and analyses**

384 Genome sequencing was performed using paired-end Illumina methodology. Illumina  
385 sequencing data were processed by removing adapters and low-quality reads using  
386 Trimmomatic v0.36 [41], with a minimum quality score of 10 and minimum read length of  
387 50. Trimmed reads were *de novo* assembled using SPAdes v3.12.0 [42] with default  
388 parameters. Draft assemblies of the 52 NMEC isolates from this study, together with six  
389 complete NMEC genomes and eight complete genomes from other characterised *E. coli*  
390 representing different phylogroups, were subjected to phylogenetic analysis using parsnp  
391 v1.5.3 [43]. A subset of 18 isolates were additionally sequenced using Oxford Nanopore  
392 Technology long-read sequencing (Nanopore). Complete NMEC genomes were achieved  
393 using a combination of Illumina short-read and Nanopore long-read data and analysis  
394 employing the MicroPIPE tool [44].

395

### 396 ***In silico* and molecular analyses**

397 Virulence-associated genes, antibiotic resistance genes, plasmids and serotyping were  
398 evaluated using ABRicate (<https://github.com/tseemann/abricate>) with built-in databases [45-  
399 48], with the percentage nucleotide identity and coverage cut-off set at 90% and 80%,  
400 respectively. Capsule typing was performed employing Kaptive [49] using an in-house *E.*  
401 *coli* capsule database [38] and manually checked. Chromosomal point mutations associated

402 with antibiotic resistance were detected using PointFinder [50]. FimH amplicon sequencing  
403 was performed as previously described [51, 52]; allelic variants were identified using  
404 FimTyper [53].

405

#### 406 **K1 ELISA**

407 K1 capsule expression was detected by ELISA using an anti-polysialic acid antibody single  
408 chain Fv fragment [54] as the primary antibody, anti-His antibody and alkaline phosphatase  
409 anti-mouse IgG as the secondary and tertiary antibodies, respectively; p-  
410 nitrophenylphosphate (Sigma) was used as the substrate. Optical density was measured at 420  
411 nm.

412

#### 413 **Metagenomic sequencing and analyses**

414 Metagenomic sequencing was performed on DNA extracted from fecal samples using the  
415 Illumina NovaSeq6000 platform. Adapters and low-quality reads were trimmed using  
416 Trimmomatic v0.36 [41], employing a minimum quality score of 10 and minimum read  
417 length of 50. Sequencing reads corresponding to human DNA were discarded by mapping the  
418 trimmed reads to the human genome hg38 (accession number GCA\_000001405.29) using  
419 bowtie2 [55]. Taxonomical profiling was performed with Kraken2 [56] followed by Bracken  
420 [57].

421

#### 422 **Long-read metagenomic sequencing**

423 Long-read metagenomic sequencing was performed on DNA extracted from a fecal sample.  
424 A HiFi gDNA library was prepared using the SMRTbell Express Template Prep Kit 2.0  
425 (PacBio, 100-938-900) according to the low input protocol (PacBio, PN 101-730-400  
426 Version 06 [June 2020]). As the sample DNA was already fragmented with a tight peak

427 (mode size 9.4 kb), no shearing was performed; the sample was concentrated using Ampure  
428 PB beads (PacBio, PCB-100-265-900) and used directly as input into library preparation.  
429 The entire quantity of purified DNA (360ng) was used to make the library as follows. The  
430 DNA was treated to remove single-stranded overhangs, followed by a DNA damage repair  
431 reaction and an end-repair/A-tailing reaction. Overhang barcoded adapters were ligated to the  
432 A-tailed library fragments, followed by a nuclease treatment to remove damaged library  
433 fragments, and then purification with AMPure PB beads. The library was size-selected to  
434 remove fragments <3kb using AMPure PB beads. The final purified, size-selected library was  
435 quantified on the Qubit fluorometer using the Qubit dsDNA HS assay kit (Invitrogen,  
436 Q32854) to assess concentration, and run on the Agilent Femto Pulse using the 55 kb BAC  
437 Analysis Kit (Agilent, FP-1003-0275) to assess fragment size distribution.

438

439 Sequencing was performed using the PacBio Sequel II (software/chemistry v10.1). The  
440 library pool was prepared for sequencing according to the SMRT Link (v10.1) sample setup  
441 calculator, following the standard protocol for Diffusion loading with Ampure PB bead  
442 purification, using Sequencing Primer v5, Sequel II Binding Kit v2.2 and the Sequel II DNA  
443 Internal Control v1. Adaptive loading was utilised, with nominated on-plate loading  
444 concentration of 80pM. The polymerase-bound library was sequenced on 1 SMRT Cell with  
445 a 30-hour movie time plus a 2-hour pre-extension using the Sequel II Sequencing 2.0 Kit  
446 (PacBio, 101-820-200) and SMRT Cell 8M (PacBio, 101-389-001).

447

448 After sequencing, the data was processed to generate CCS reads and demultiplex samples  
449 using the default settings of the CCS with Demultiplexing application in SMRT Link (v10.1).  
450 The demultiplexed reads were assembled *de novo* using Hifiasm [58]. Assembled contigs  
451 were subject to taxonomic profiling using kraken2 [56] and fastANI [59]. Contigs

452 taxonomically assigned as *Escherichia coli* were subjected to *in silico* sequence typing using  
453 MLST (<https://github.com/tseemann/mlst>) and mlst profiles from PubMLST [60].

454

455 **Author Contributions:** Conceptualization, MAS, AB, BW-W and ADI.; Investigation,  
456 NTKN, M-DP, SJH, KMP, LA-F, BMF, SBA, and TM.; Formal analysis, NTKN, M-DP,  
457 ADI and MAS., Resources, PNAH, SAB, SS, HB, PT, AB, BW-W, ADI and MAS.; Writing  
458 – Original Draft, NTKN, ADI and MAS.; Writing – Review & Editing, All Authors.;  
459 Supervision, ADI and MAS.; Funding Acquisition, NTKN, M-DP, PNAH, SAB, SS, PT,  
460 ADI, MAS.

461

462 **Declaration of interests:** The authors declare that they have no conflict of interest.

463

464 **Data sharing:** Genome sequence data have been deposited in the Sequence Read Archive  
465 under the BioProjects PRJNA757133 and PRJNA893826. Sample accession numbers are  
466 listed in Supplementary Table 4.

467

#### 468 **Acknowledgments**

469 The authors would like to thank Michelle Bauer for technical expertise and the laboratories  
470 contributing the isolates, Pathology Queensland and Mater Pathology. At the time of the  
471 study SS was affiliated with Mater Pathology, South Brisbane, Australia. This work was  
472 supported by project grants APP1181958 and APP2001431 (to MAS, MDP and NTKN) and  
473 an Investigator grant GNT1197743 (to ADI) from the National Health and Medical Research  
474 Council of Australia (NHMRC), a Children’s Hospital Foundation Innovator grant (50270, to  
475 MAS, ADI, PNAH, SAB and SS), an Australian Infectious Diseases Research Centre grant

476 (to MAS, ADI and NTKN), a grant from the Genome Innovation Hub at the University of  
477 Queensland, and a grant from the Wellcome Trust to PT (Grant number 220211). For the  
478 purpose of open access, the author (PT) has applied a CC BY public copyright licence to any  
479 Author Accepted Manuscript version arising from this submission.

480

481

## 482 References

- 483 1. Doctor BA, Newman N, Minich NM, Taylor HG, Fanaroff AA, Hack M. Clinical  
484 outcomes of neonatal meningitis in very-low birth-weight infants. *Clin Pediatr (Phila)*  
485 **2001**; 40(9): 473-80.
- 486 2. Stevens JP, Eames M, Kent A, Halket S, Holt D, Harvey D. Long term outcome of  
487 neonatal meningitis. *Arch Dis Child Fetal Neonatal Ed* **2003**; 88(3): F179-84.
- 488 3. Harvey D, Holt DE, Bedford H. Bacterial meningitis in the newborn: a prospective  
489 study of mortality and morbidity. *Semin Perinatol* **1999**; 23(3): 218-25.
- 490 4. Ouchenir L, Renaud C, Khan S, et al. The Epidemiology, Management, and Outcomes  
491 of Bacterial Meningitis in Infants. *Pediatrics* **2017**; 140(1).
- 492 5. Gaschignard J, Levy C, Romain O, et al. Neonatal Bacterial Meningitis: 444 Cases in 7  
493 Years. *Pediatr Infect Dis J* **2011**; 30(3): 212-7.
- 494 6. Basmaci R, Bonacorsi S, Bidet P, et al. Escherichia Coli Meningitis Features in 325  
495 Children From 2001 to 2013 in France. *Clin Infect Dis* **2015**; 61(5): 779-86.
- 496 7. May M, Daley AJ, Donath S, Isaacs D, Australasian Study Group for Neonatal I. Early  
497 onset neonatal meningitis in Australia and New Zealand, 1992-2002. *Arch Dis Child*  
498 *Fetal Neonatal Ed* **2005**; 90(4): F324-7.
- 499 8. Holt DE, Halket S, de Louvois J, Harvey D. Neonatal meningitis in England and Wales:  
500 10 years on. *Arch Dis Child Fetal Neonatal Ed* **2001**; 84(2): F85-9.
- 501 9. van der Flier M. Neonatal meningitis: small babies, big problem. *Lancet Child Adolesc*  
502 *Health* **2021**; 5(6): 386-7.
- 503 10. Anderson SG, Gilbert GL. Neonatal gram negative meningitis: a 10-year review, with  
504 reference to outcome and relapse of infection. *J Paediatr Child Health* **1990**; 26(4):  
505 212-6.
- 506 11. Geslain G, Birgy A, Adiba S, et al. Genome sequencing of strains of the most  
507 prevalent clonal group of O1:K1:H7 Escherichia coli that causes neonatal meningitis  
508 in France. *BMC Microbiol* **2019**; 19(1): 17.
- 509 12. Sarff LD, McCracken GH, Schiffer MS, et al. Epidemiology of Escherichia coli K1 in  
510 healthy and diseased newborns. *Lancet* **1975**; 1(7916): 1099-104.
- 511 13. Plainvert C, Bidet P, Peigne C, et al. A new O-antigen gene cluster has a key role in  
512 the virulence of the Escherichia coli meningitis clone O45:K1:H7. *J Bacteriol* **2007**;  
513 189.
- 514 14. Bidet P, Mahjoub-Messai F, Blanco J, et al. Combined multilocus sequence typing and  
515 O serogrouping distinguishes Escherichia coli subtypes associated with infant  
516 urosepsis and/or meningitis. *J Infect Dis* **2007**; 196(2): 297-303.
- 517 15. Johnson JR, Oswald E, O'Bryan TT, Kuskowski MA, Spanjaard L. Phylogenetic  
518 distribution of virulence-associated genes among Escherichia coli isolates associated  
519 with neonatal bacterial meningitis in the Netherlands. *J Infect Dis* **2002**; 185(6): 774-  
520 84.
- 521 16. Robbins JB, McCracken GH, Jr., Gotschlich EC, Orskov F, Orskov I, Hanson LA.  
522 Escherichia coli K1 capsular polysaccharide associated with neonatal meningitis. *N*  
523 *Engl J Med* **1974**; 290(22): 1216-20.
- 524 17. Prasadarao NV, Wass CA, Hacker J, Jann K, Kim KS. Adhesion of S-fimbriated  
525 Escherichia coli to brain glycolipids mediated by sfaA gene-encoded protein of S-  
526 fimbriae. *J Biol Chem* **1993**; 268(14): 10356-63.

- 527 18. Prasadarao NV, Wass CA, Weiser JN, Stins MF, Huang SH, Kim KS. Outer membrane  
528 protein A of *Escherichia coli* contributes to invasion of brain microvascular  
529 endothelial cells. *Infect Immun* **1996**; 64(1): 146-53.
- 530 19. Huang SH, Chen YH, Kong G, et al. A novel genetic island of meningitic *Escherichia*  
531 *coli* K1 containing the *ibeA* invasion gene (*GimA*): functional annotation and carbon-  
532 source-regulated invasion of human brain microvascular endothelial cells. *Funct*  
533 *Integr Genomics* **2001**; 1(5): 312-22.
- 534 20. Wang MH, Kim KS. Cytotoxic necrotizing factor 1 contributes to *Escherichia coli*  
535 meningitis. *Toxins (Basel)* **2013**; 5(11): 2270-80.
- 536 21. Peigne C, Bidet P, Mahjoub-Messai F, et al. The plasmid of *Escherichia coli* strain S88  
537 (O45:K1:H7) that causes neonatal meningitis is closely related to avian pathogenic *E.*  
538 *coli* plasmids and is associated with high-level bacteremia in a neonatal rat  
539 meningitis model. *Infect Immun* **2009**; 77(6): 2272-84.
- 540 22. Zhou Z, Alikhan NF, Mohamed K, Fan Y, Agama Study G, Achtman M. The Enterobase  
541 user's guide, with case studies on *Salmonella* transmissions, *Yersinia pestis*  
542 phylogeny, and *Escherichia* core genomic diversity. *Genome Res* **2020**; 30(1): 138-52.
- 543 23. Johnson TJ, Elnekave E, Miller EA, et al. Phylogenomic Analysis of Extraintestinal  
544 Pathogenic *Escherichia coli* Sequence Type 1193, an Emerging Multidrug-Resistant  
545 Clonal Group. *Antimicrob Agents Chemother* **2019**; 63(1).
- 546 24. Reed TAN, Krang S, Miliya T, et al. Antimicrobial resistance in Cambodia: a review. *Int*  
547 *J Infect Dis* **2019**; 85: 98-107.
- 548 25. Forde BM, Roberts LW, Phan MD, et al. Population dynamics of an *Escherichia coli*  
549 ST131 lineage during recurrent urinary tract infection. *Nat Commun* **2019**; 10(1):  
550 3643.
- 551 26. Tullus K, Horlin K, Svenson SB, Kallenius G. Epidemic outbreaks of acute  
552 pyelonephritis caused by nosocomial spread of P fimbriated *Escherichia coli* in  
553 children. *J Infect Dis* **1984**; 150(5): 728-36.
- 554 27. van Dijk LR, Walker BJ, Straub TJ, et al. StrainGE: a toolkit to track and characterize  
555 low-abundance strains in complex microbial communities. *Genome Biol* **2022**; 23(1):  
556 74.
- 557 28. Wijetunge DS, Gongati S, DebRoy C, et al. Characterizing the pathotype of neonatal  
558 meningitis causing *Escherichia coli* (NMEC). *BMC Microbiol* **2015**; 15: 211.
- 559 29. Bidet P, Mahjoub-Messai F, Blanco J, et al. Combined Multilocus Sequence Typing  
560 and O Serogrouping Distinguishes *Escherichia coli* Subtypes Associated with Infant  
561 Urosepsis and/or Meningitis. *J Infect Dis* **2007**; 196.
- 562 30. Manges AR, Geum HM, Guo A, Edens TJ, Fibke CD, Pitout JDD. Global Extraintestinal  
563 Pathogenic *Escherichia coli* (ExPEC) Lineages. *Clin Microbiol Rev* **2019**; 32(3).
- 564 31. Kallonen T, Brodrick HJ, Harris SR, et al. Systematic longitudinal survey of invasive  
565 *Escherichia coli* in England demonstrates a stable population structure only  
566 transiently disturbed by the emergence of ST131. *Genome Res* **2017**.
- 567 32. Platell JL, Trott DJ, Johnson JR, et al. Prominence of an O75 clonal group (clonal  
568 complex 14) among non-ST131 fluoroquinolone-resistant *Escherichia coli* causing  
569 extraintestinal infections in humans and dogs in Australia. *Antimicrob Agents*  
570 *Chemother* **2012**; 56(7): 3898-904.
- 571 33. Tchesnokova VL, Rechkina E, Larson L, et al. Rapid and Extensive Expansion in the  
572 United States of a New Multidrug-resistant *Escherichia coli* Clonal Group, Sequence  
573 Type 1193. *Clin Infect Dis* **2019**; 68(2): 334-7.



- 574 34. Nielsen DW, Ricker N, Barbieri NL, et al. Complete Genome Sequence of the  
575 Multidrug-Resistant Neonatal Meningitis Escherichia coli Serotype O75:H5:K1 Strain  
576 mcjchv-1 (NMEC-O75). *Microbiol Resour Announc* **2018**; 7(10).
- 577 35. Ding Y, Zhang J, Yao K, Gao W, Wang Y. Molecular characteristics of the new  
578 emerging global clone ST1193 among clinical isolates of Escherichia coli from  
579 neonatal invasive infections in China. *Eur J Clin Microbiol Infect Dis* **2021**; 40(4): 833-  
580 40.
- 581 36. Fleiss N, Schwabenbauer K, Randis TM, Polin RA. What's new in the management of  
582 neonatal early-onset sepsis? *Arch Dis Child Fetal Neonatal Ed* **2023**; 108(1): 10-4.
- 583 37. Fuchs A, Bielicki J, Mathur S, Sharland M, Van Den Anker JN. Reviewing the WHO  
584 guidelines for antibiotic use for sepsis in neonates and children. *Paediatr Int Child*  
585 *Health* **2018**; 38(sup1): S3-S15.
- 586 38. Goh KGK, Phan MD, Forde BM, et al. Genome-Wide Discovery of Genes Required for  
587 Capsule Production by Uropathogenic Escherichia coli. *mBio* **2017**; 8(5).
- 588 39. Vissing NH, Monster MB, Nordly S, et al. Relapse of Neonatal Escherichia coli  
589 Meningitis: Did We Miss Something at First? *Children (Basel)* **2021**; 8(2).
- 590 40. Bingen E, Cave H, Aujard Y, et al. Molecular analysis of multiply recurrent meningitis  
591 due to Escherichia coli K1 in an infant. *Clin Infect Dis* **1993**; 16(1): 82-5.
- 592 41. Bolger AM, Lohse M, Usadel B. Trimmomatic: a flexible trimmer for Illumina  
593 sequence data. *Bioinformatics* **2014**; 30(15): 2114-20.
- 594 42. Bankevich A, Nurk S, Antipov D, et al. SPAdes: a new genome assembly algorithm  
595 and its applications to single-cell sequencing. *J Comput Biol* **2012**; 19(5): 455-77.
- 596 43. Treangen TJ, Ondov BD, Koren S, Phillippy AM. The Harvest suite for rapid core-  
597 genome alignment and visualization of thousands of intraspecific microbial genomes.  
598 *Genome Biol* **2014**; 15(11): 524.
- 599 44. Murigneux V, Roberts LW, Forde BM, et al. MicroPIPE: validating an end-to-end  
600 workflow for high-quality complete bacterial genome construction. *BMC Genomics*  
601 **2021**; 22(1): 474.
- 602 45. Chen L, Zheng D, Liu B, Yang J, Jin Q. VFDB 2016: hierarchical and refined dataset for  
603 big data analysis--10 years on. *Nucleic Acids Res* **2016**; 44(D1): D694-7.
- 604 46. Feldgarden M, Brover V, Haft DH, et al. Using the NCBI AMRFinder Tool to Determine  
605 Antimicrobial Resistance Genotype-Phenotype Correlations Within a Collection of  
606 NARMS Isolates. **2019**: 550707.
- 607 47. Carattoli A, Zankari E, Garcia-Fernandez A, et al. In silico detection and typing of  
608 plasmids using PlasmidFinder and plasmid multilocus sequence typing. *Antimicrob*  
609 *Agents Chemother* **2014**; 58(7): 3895-903.
- 610 48. Ingle DJ, Valcanis M, Kuzevski A, et al. In silico serotyping of E. coli from short read  
611 data identifies limited novel O-loci but extensive diversity of O:H serotype  
612 combinations within and between pathogenic lineages. *Microb Genom* **2016**; 2(7):  
613 e000064.
- 614 49. Wyres KL, Wick RR, Gorrie C, et al. Identification of Klebsiella capsule synthesis loci  
615 from whole genome data. *Microb Genom* **2016**; 2(12): e000102.
- 616 50. Zankari E, Allesoe R, Joensen KG, Cavaco LM, Lund O, Aarestrup FM. PointFinder: a  
617 novel web tool for WGS-based detection of antimicrobial resistance associated with  
618 chromosomal point mutations in bacterial pathogens. *J Antimicrob Chemother* **2017**;  
619 72(10): 2764-8.

- 620 51. Willner D, Low S, Steen JA, et al. Single clinical isolates from acute uncomplicated  
621 urinary tract infections are representative of dominant in situ populations. *mBio*  
622 **2014**; 5(2): e01064-13.
- 623 52. Chen Z, Phan MD, Bates LJ, et al. The urinary microbiome in patients with refractory  
624 urge incontinence and recurrent urinary tract infection. *Int Urogynecol J* **2018**;  
625 29(12): 1775-82.
- 626 53. Roer L, Tchesnokova V, Allesoe R, et al. Development of a Web Tool for *Escherichia*  
627 *coli* Subtyping Based on *fimH* Alleles. *J Clin Microbiol* **2017**; 55(8): 2538-43.
- 628 54. Nagae M, Ikeda A, Hane M, et al. Crystal structure of anti-polysialic acid antibody  
629 single chain Fv fragment complexed with octasialic acid: insight into the binding  
630 preference for polysialic acid. *J Biol Chem* **2013**; 288(47): 33784-96.
- 631 55. Langmead B, Salzberg SL. Fast gapped-read alignment with Bowtie 2. *Nat Methods*  
632 **2012**; 9(4): 357-9.
- 633 56. Wood DE, Lu J, Langmead B. Improved metagenomic analysis with Kraken 2.  
634 *Genome Biol* **2019**; 20(1): 257.
- 635 57. Jennifer Lu FPB, Peter Thielen, Steven L. Salzberg. Bracken: estimating species  
636 abundance in metagenomics data. *PeerJ Computer Science* **2017**; 3(e104).
- 637 58. Cheng H, Concepcion GT, Feng X, Zhang H, Li H. Haplotype-resolved de novo  
638 assembly using phased assembly graphs with hifiasm. *Nat Methods* **2021**; 18(2): 170-  
639 5.
- 640 59. Jain C, Rodriguez RL, Phillippy AM, Konstantinidis KT, Aluru S. High throughput ANI  
641 analysis of 90K prokaryotic genomes reveals clear species boundaries. *Nat Commun*  
642 **2018**; 9(1): 5114.
- 643 60. Jolley KA, Maiden MC. BIGSdb: Scalable analysis of bacterial genome variation at the  
644 population level. *BMC Bioinformatics* **2010**; 11: 595.

645  
646

647 **Figures**

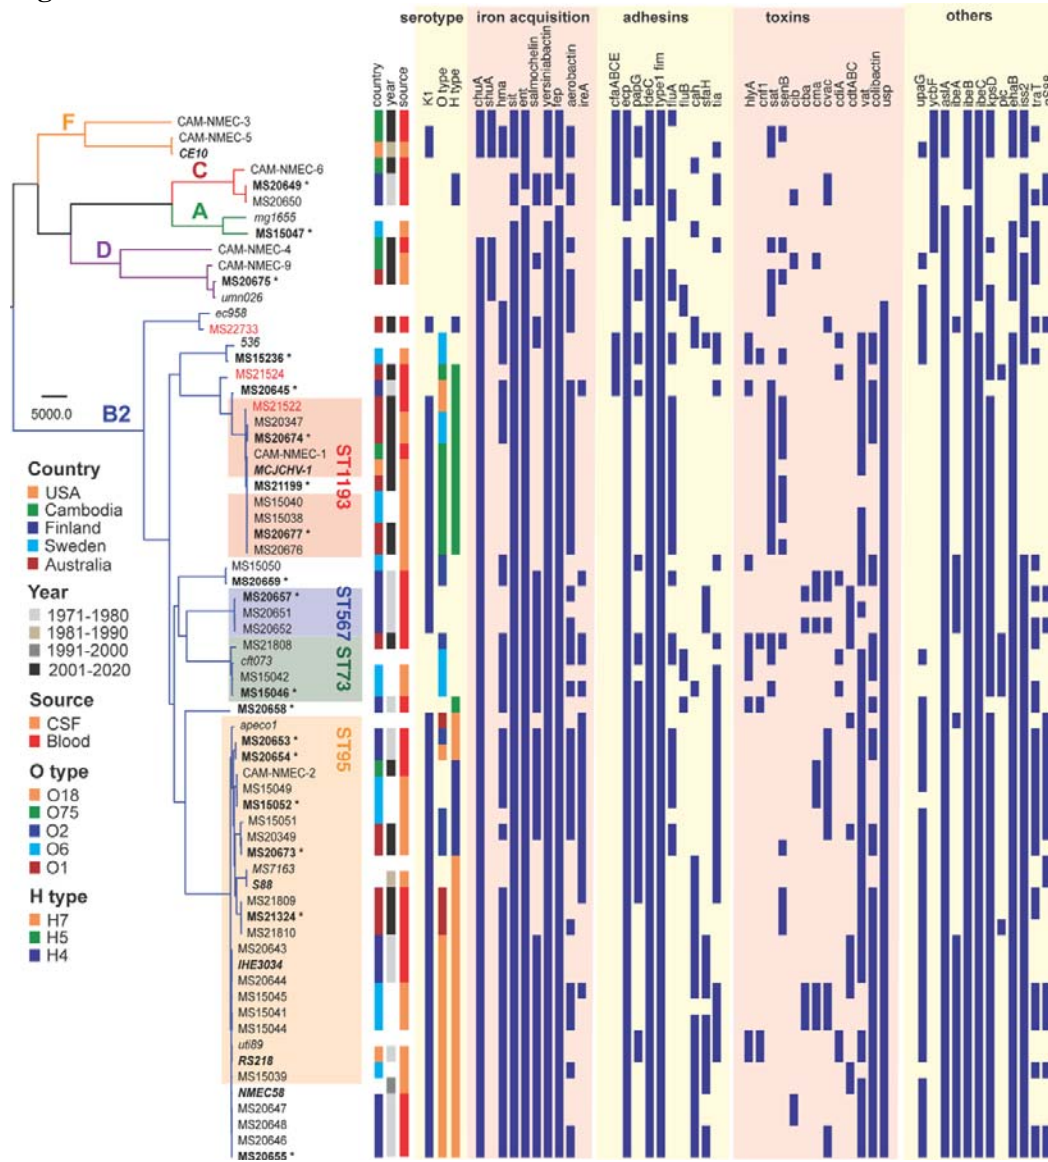

648  
649

650 **Figure 1.** Maximum likelihood phylogram displaying the relationship of the NMEC isolates with  
 651 their associated serotype and virulence factor profile. Non-NMEC isolates used in the analysis for  
 652 referencing are italicized. The phylogram was built and recombination regions removed employing  
 653 Parsnp, using 185,911 core single nucleotide polymorphisms (SNPs) and NMEC strain IHE3034 as  
 654 the reference. The scale bar indicates branch lengths in numbers of SNPs. NMEC isolates with  
 655 available complete genomes are bold-italicized, while NMEC isolates that were completely sequenced  
 656 in this study are indicated in bold and marked with an asterisk. The NMEC isolates that caused  
 657 recrudescence in this study are indicated in red. Branches are colored according to  
 658 phylogroups: orange, phylogroup F; red, phylogroup C; green, phylogroup A; violet, phylogroup D  
 659 and blue, phylogroup B2. The presence of specific virulence factors is indicated in dark blue. The  
 660 phylogeny can be viewed interactively at <http://microreact.org/project/oNfA4v16h3tQbqREoYtCXj->

661 [high-risk-escherichia-coli-clones-that-cause-neonatal-meningitis-and-association-with-recrudescence-](#)  
 662 [infection.](#)  
 663

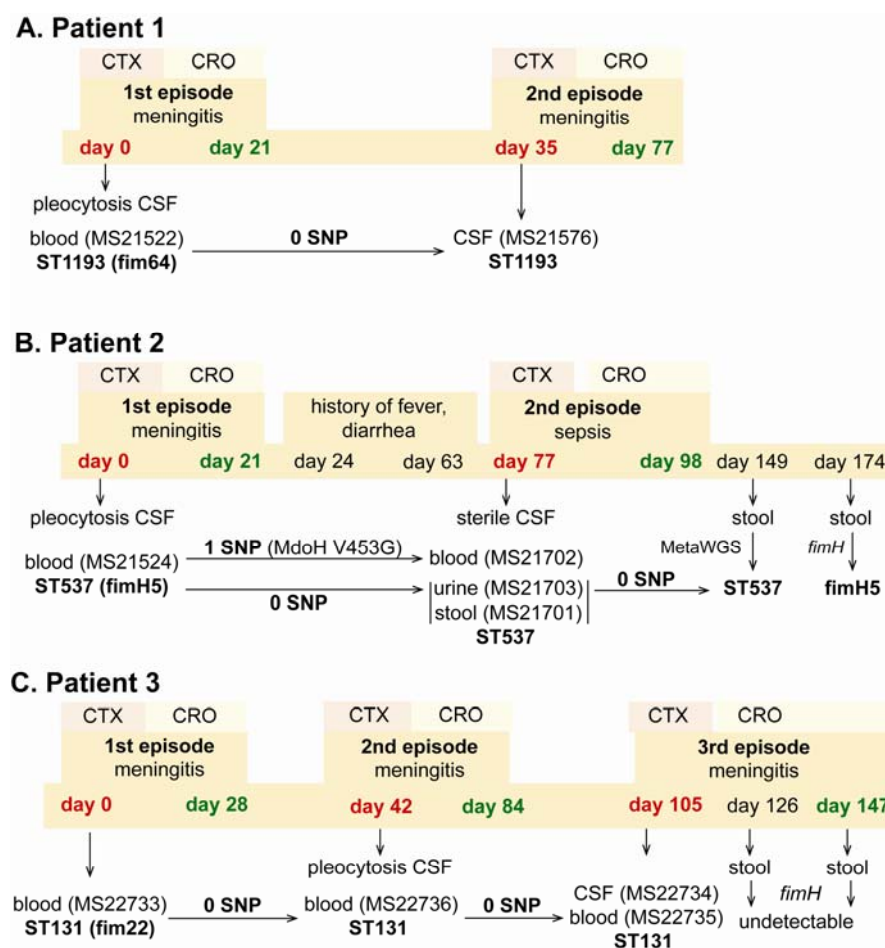

664  
 665 **Figure 2.** Infection and treatment profile of patients suffering from NM and recurrent invasive  
 666 infection. Indicated is the hospital admission history of patients, together with the timeline of sample  
 667 collection, identified *E. coli* isolates and their infection source, and isolate identification based on  
 668 whole genome sequencing, metagenomic sequencing (MetaWGS) or *fimH* amplicon sequencing.  
 669 Genomic relatedness is indicated based on the number of single nucleotide polymorphisms (SNPs).  
 670 The time of admission for the initial episode is indicated as Day 0, with subsequent timepoints  
 671 indicated as days post initial admission. Admission and discharge days are indicated in red and green,  
 672 respectively.  
 673

A. Patient 2

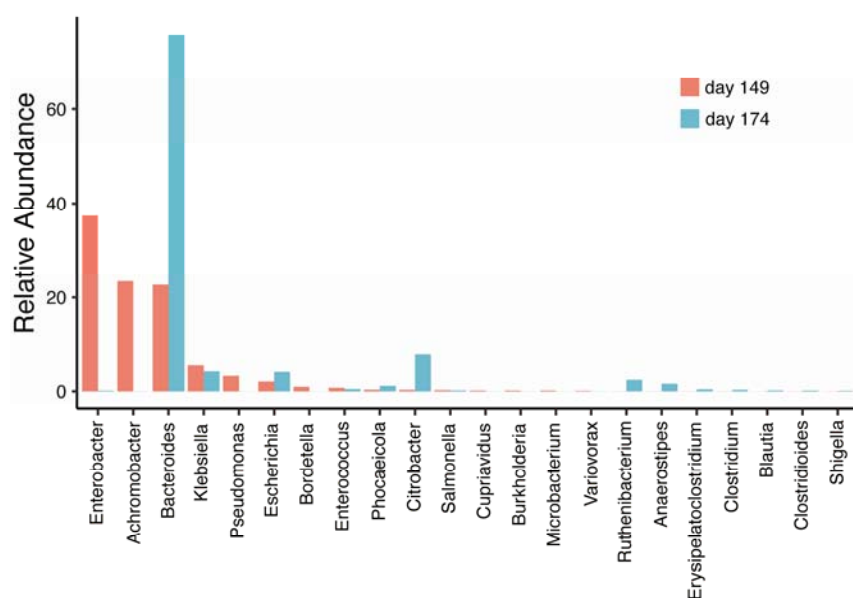

B. Patient 3

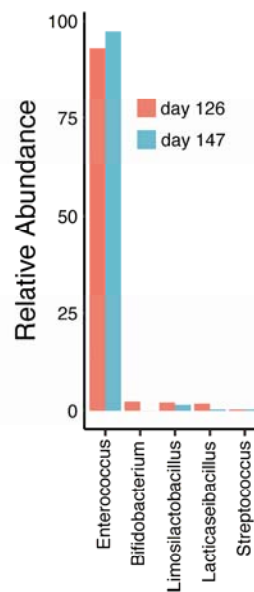

674

675 **Figure 3.** Relative abundance of bacterial genera ( $\geq 0.01\%$ ) in the gut microbiome of patient 2 at 8-  
 676 and 12-week follow-up post relapsed infection (days 149 and 174 after initial admission) (A) and  
 677 patient 3 during treatment and at discharge after the third episode (days 126 and 147 after initial  
 678 admission) (B).

679

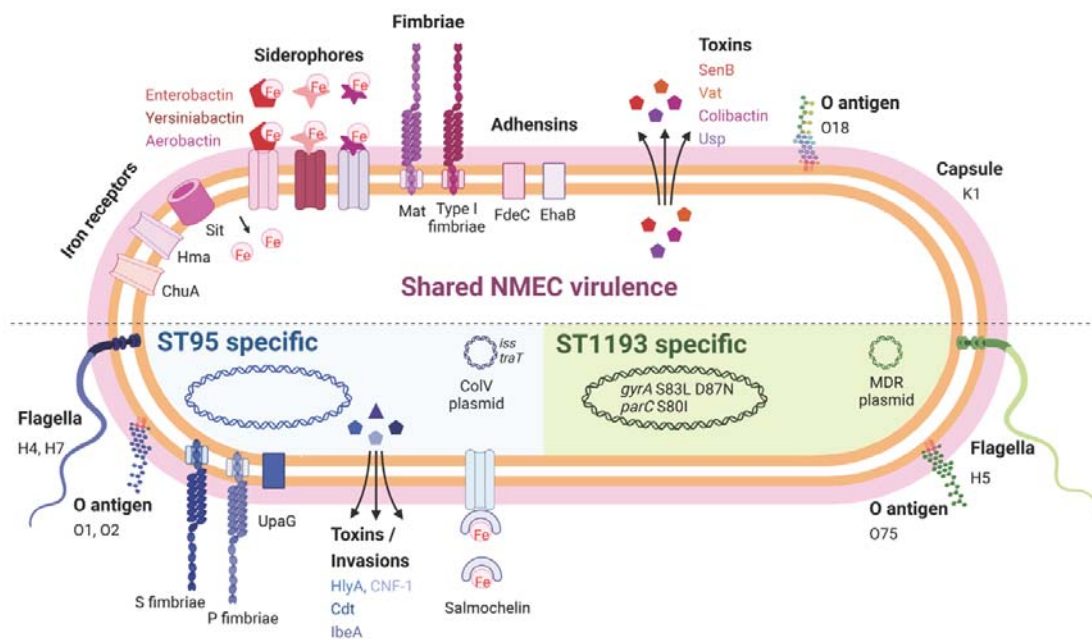

680

681 **Figure 4.** Summary of key NMEC virulence genes based on genome profiling performed in this  
 682 study. Shown are shared virulence genes common to most NMEC, as well as ST95- and ST1193-  
 683 specific NMEC virulence genes. Figure created with BioRender.com.

684

685 **Supplementary Figure Legends**

686

687 **Figure S1.** Number of human-derived *E. coli* strains from ST95, ST1193, ST38, ST131, ST73, ST10  
688 and ST69 available in the Enterobase database. Strains were stratified based on their year of isolation,  
689 spanning the periods before 2000, 2001-2005, 2006-2010, 2011-2015 and 2016-2022.

690

691 **Figure S2.** Antibiotic resistance gene profile of NMEC strains in the collection. The presence of each  
692 resistance gene is denoted by black shading.

693

694 **Figure S3.** ST95 NMEC strains contain more virulence factors than ST1193 NMEC strains. (A) The  
695 number of virulence genes (grouped as in Fig.1) for each strain within each ST. (B) The number of  
696 virulence genes grouped by their functions in ST95 versus ST1193 strains. P-value were calculated  
697 using Mann-Whitney two-tailed unpaired test.

698

699 **Figure S4.** K1 capsule production in NMEC. K1 capsule production was detected by ELISA using a  
700 monoclonal antibody specific for polysialic acid. Strains with an  $OD_{420} > 0.133$  (mean + 3 standard  
701 deviations of a negative control *kpsD* mutant; dashed line) were considered positive for K1 capsule  
702 production. Data points represent independent biological replicates with horizontal lines as the mean.

703

704 **Supplementary Tables**

705

706 **Supplementary Table 1.** Isolates used in this study.

707

708 **Supplementary Table 2.** Completely sequenced NMEC isolates.

709

710 **Supplementary Table 3.** Metagenomic sequence analysis.

711

712 **Supplementary Table 4.** Accession numbers of strains sequenced in the study

ST 10 1193 131 38 69 73 95

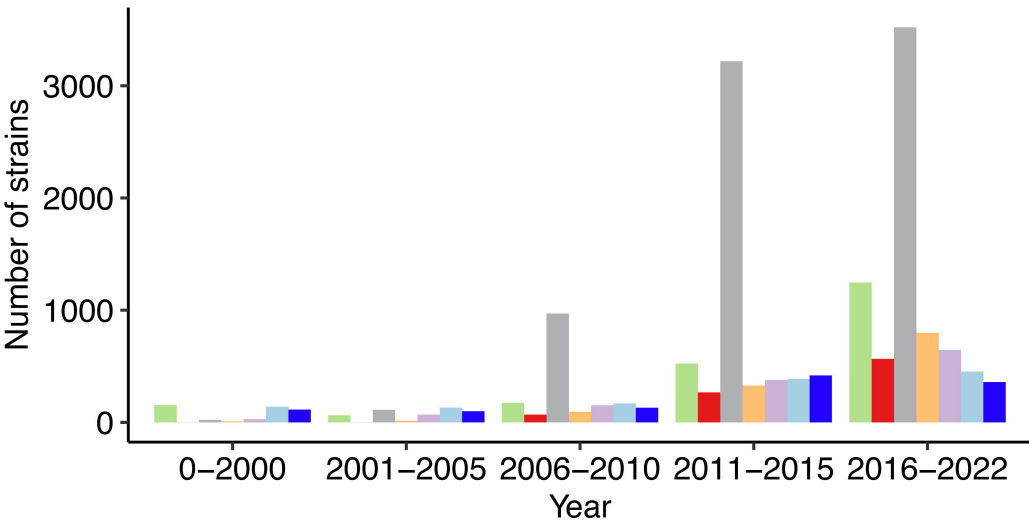

(flu)quinolones

Aminoglycosides

beta-lactam

Trimethoprim

Sulfonamides

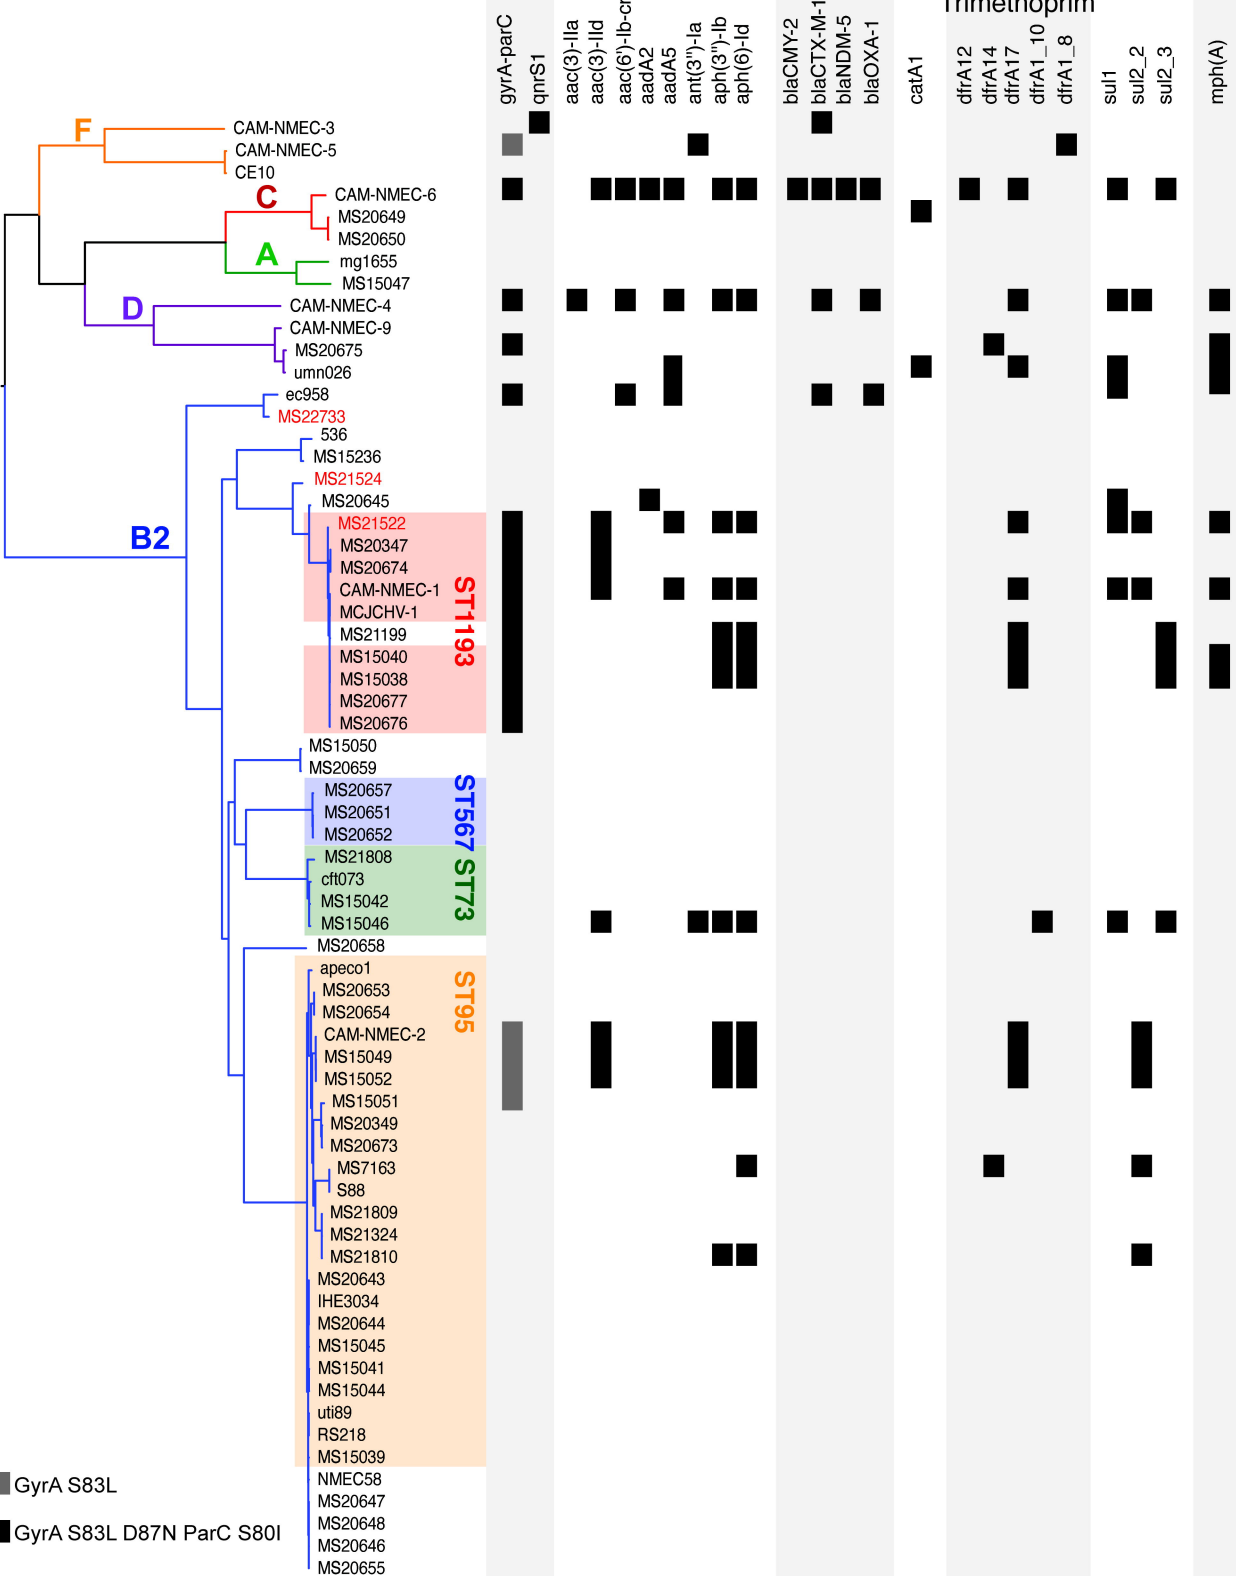



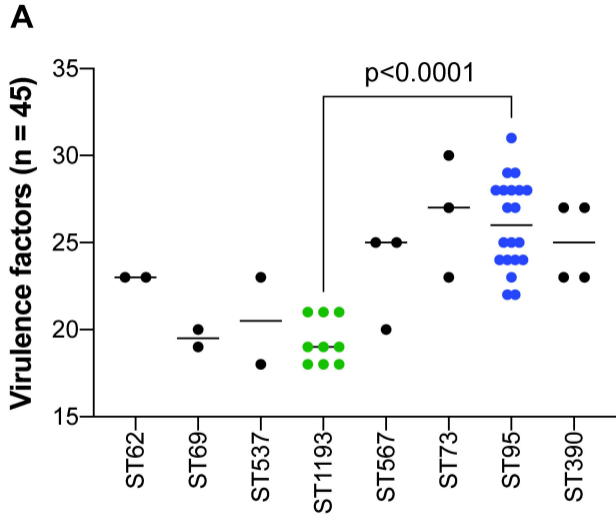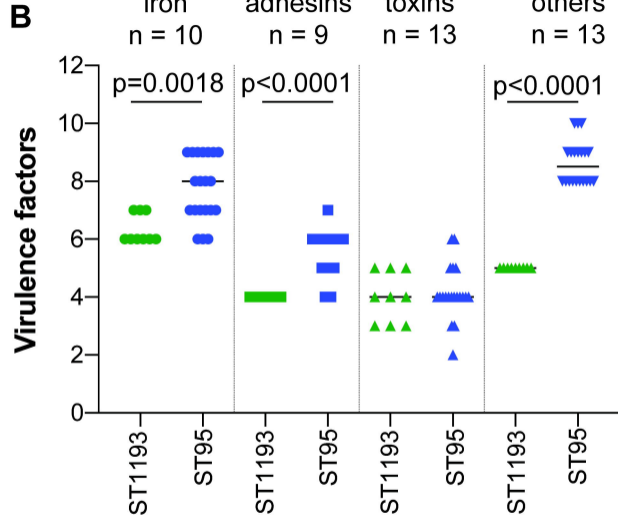

OD420

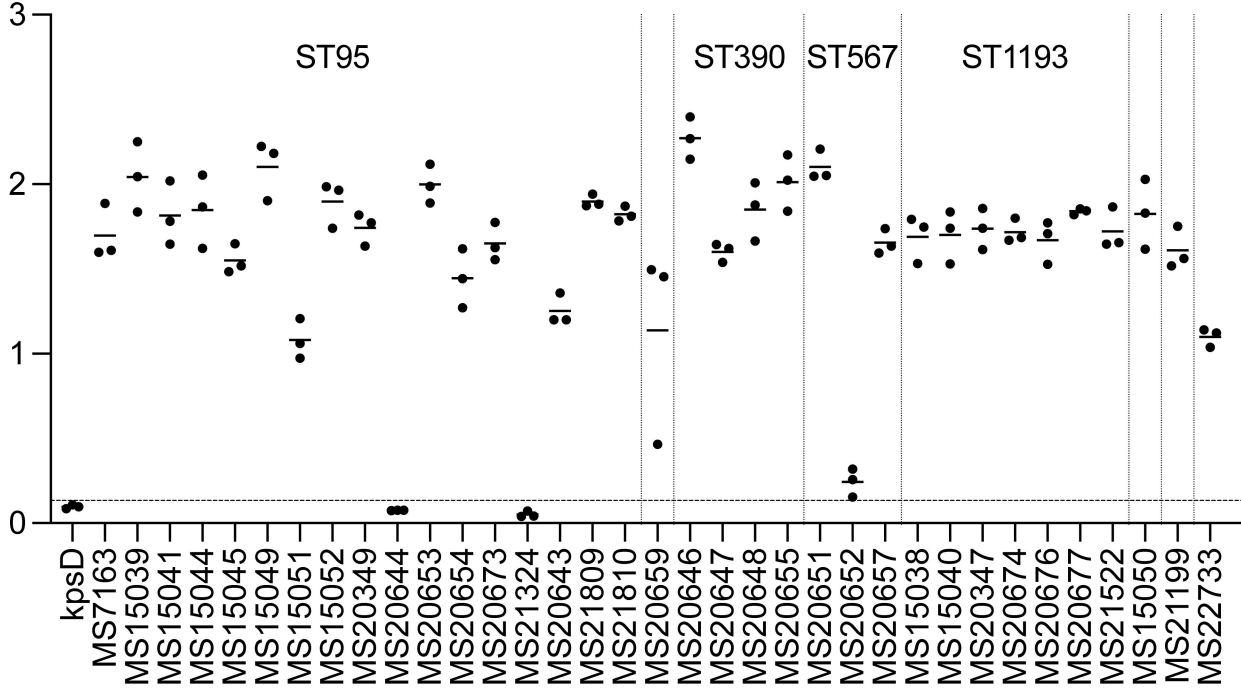

Source: https://medrxiv.org/content/10.1101/2023.10.05.23296362v2.full.pdf
